# Supplementary material for: Factors influencing the photocatalytic activity of rutile TiO2 nanorods with different aspect ratios for dye degradation and Cr(vi) photoreduction
Source: Royal Society of Chemistry journal article supplement (doi:10.1039/c5cp02354h), 2015-01-01
Supplement: c5cp02354h1.pdf [file c5cp02354h1.pdf]

**Factors influencing the photocatalytic activity of rutile TiO<sub>2</sub> nanorods with  
different aspect ratios for dye degradation and Cr(VI) photoreduction**

Zewei Yang<sup>a</sup>, Bing Wang<sup>a\*</sup>, Jin Zhang<sup>b</sup>, Hao Cui<sup>a</sup>, Yang Pan<sup>a</sup>, Hao An<sup>a</sup>, Jianping  
Zhai<sup>a</sup>

<sup>a</sup> *State Key Laboratory of Pollution Control and Resource Reuse, and School of the*

*Environment, Nanjing University, Nanjing 210046, PR China*

<sup>b</sup> *School of Biochemical and Environmental Engineering, Nanjing Xiaozhuang*

*University, Nanjing 211171, PR China*

\*Corresponding author. Email: [bingwang@nju.edu.cn](mailto:bingwang@nju.edu.cn);

Tel: +86 25 83592903;

Fax: +86 25 83592903.

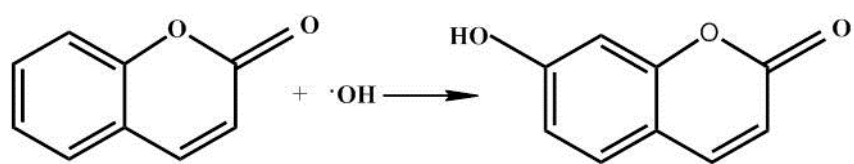

**Scheme S1** Formation of fluorescent product umbelliferone by the reaction of coumarin probe molecules with OH radicals.

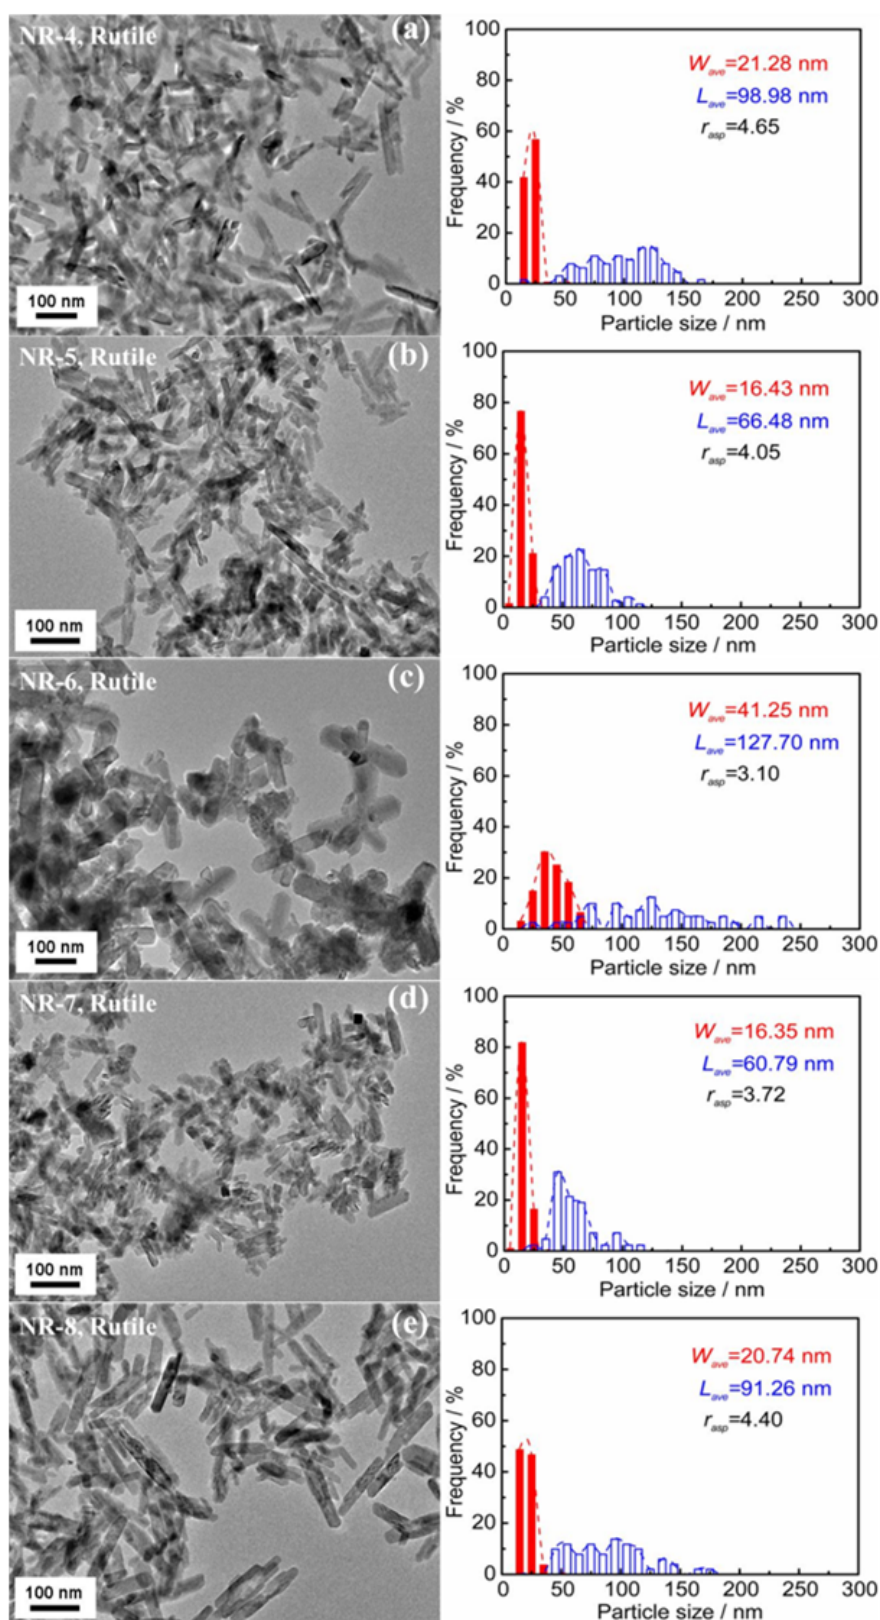

**Fig. S1** TEM images (left) and corresponding histograms of particle width (red) and

length (blue) (right) of (a) NR-4, (b) NR-5, (c) NR-6, (d) NR-7, and (e) NR-8

prepared without polymer.

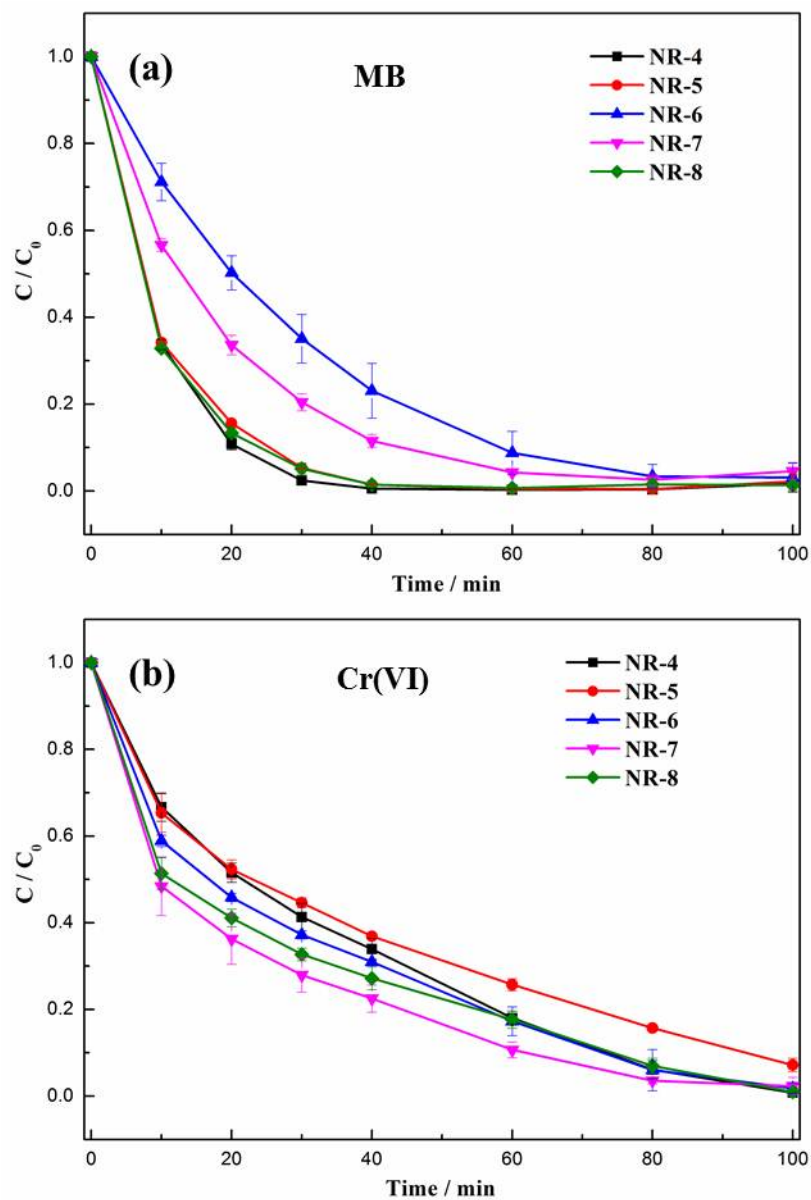

**Fig. S2** Photocatalytic evolution of the concentration ( $C/C_0$ ) of (a) MB degradation and (b) Cr(VI) reduction using samples NR-4–8 without polymer.

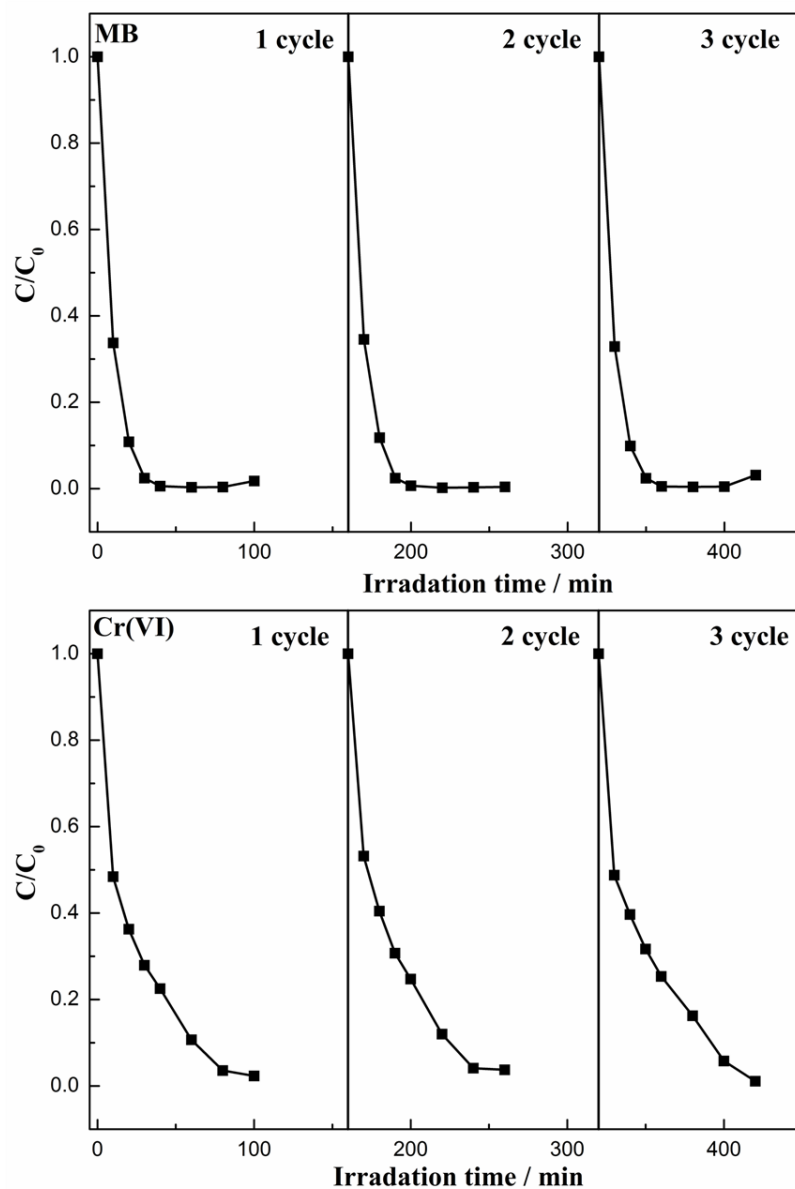

**Fig. S3** Degradation of MB with recycled NR-4 and reduction of Cr(VI) with recycled NR-7.

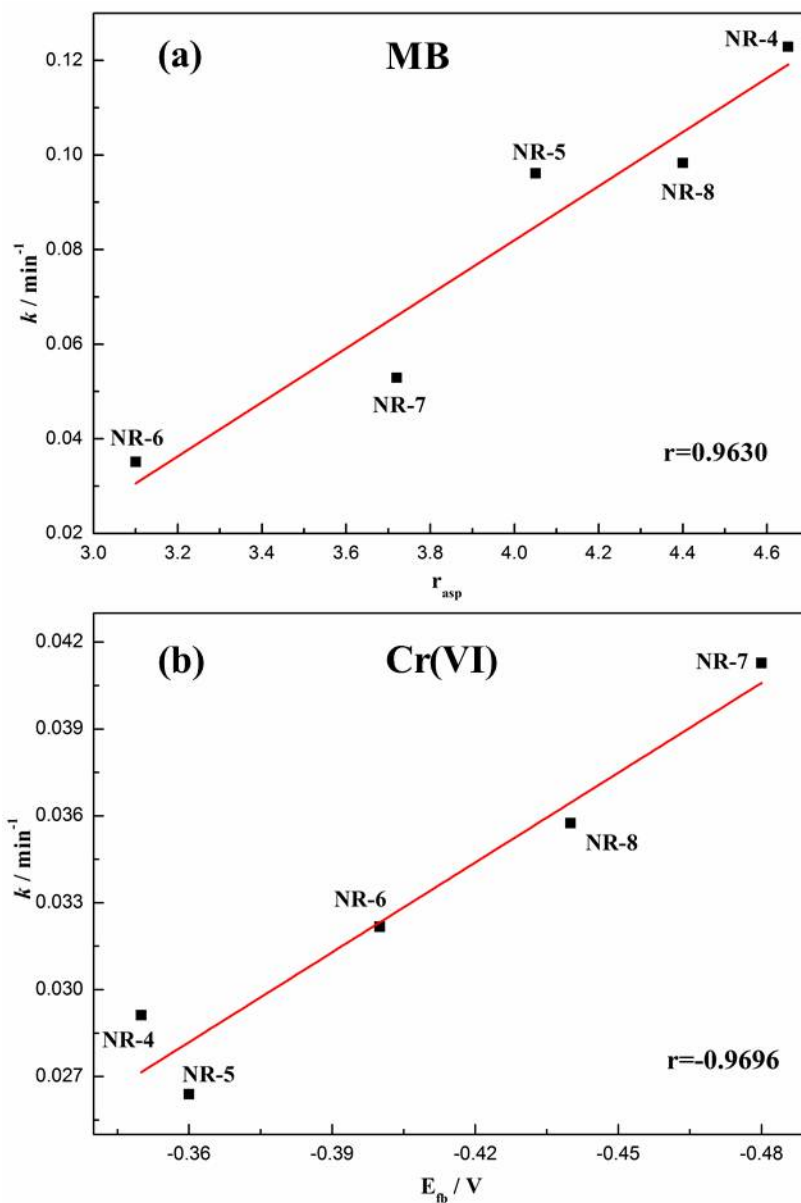

**Fig. S4** Correlations between (a)  $k$  and  $r_{\text{asp}}$ ; (b)  $k$  and  $E_{\text{fb}}$  of samples NR-4–8 for photocatalytic MB degradation and Cr(VI) reduction.

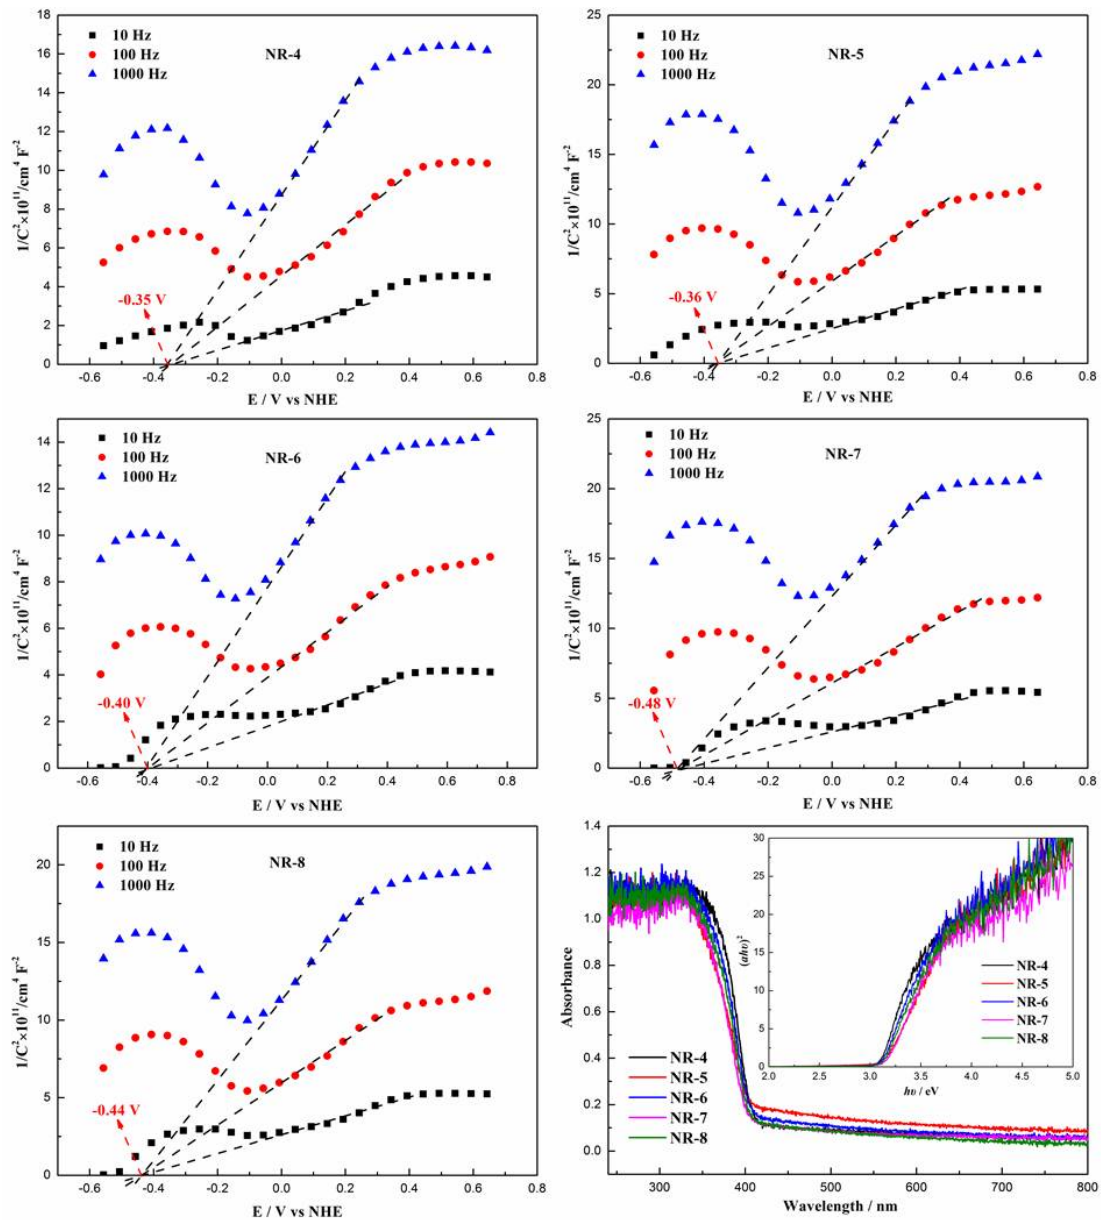

**Fig. S5** Mott-Schottky plots obtained at different frequencies for the TiO<sub>2</sub> film electrodes prepared with samples NR-4–8 without polymer (TiO<sub>2</sub> film / Saturated Calomel / Pt in 0.1 M KCl) and their UV-Vis diffuse reflectance spectra (corresponding polts of  $(\alpha h\nu)^2$  verse energy ( $h\nu$ ) for samples NR4~8 inserted).

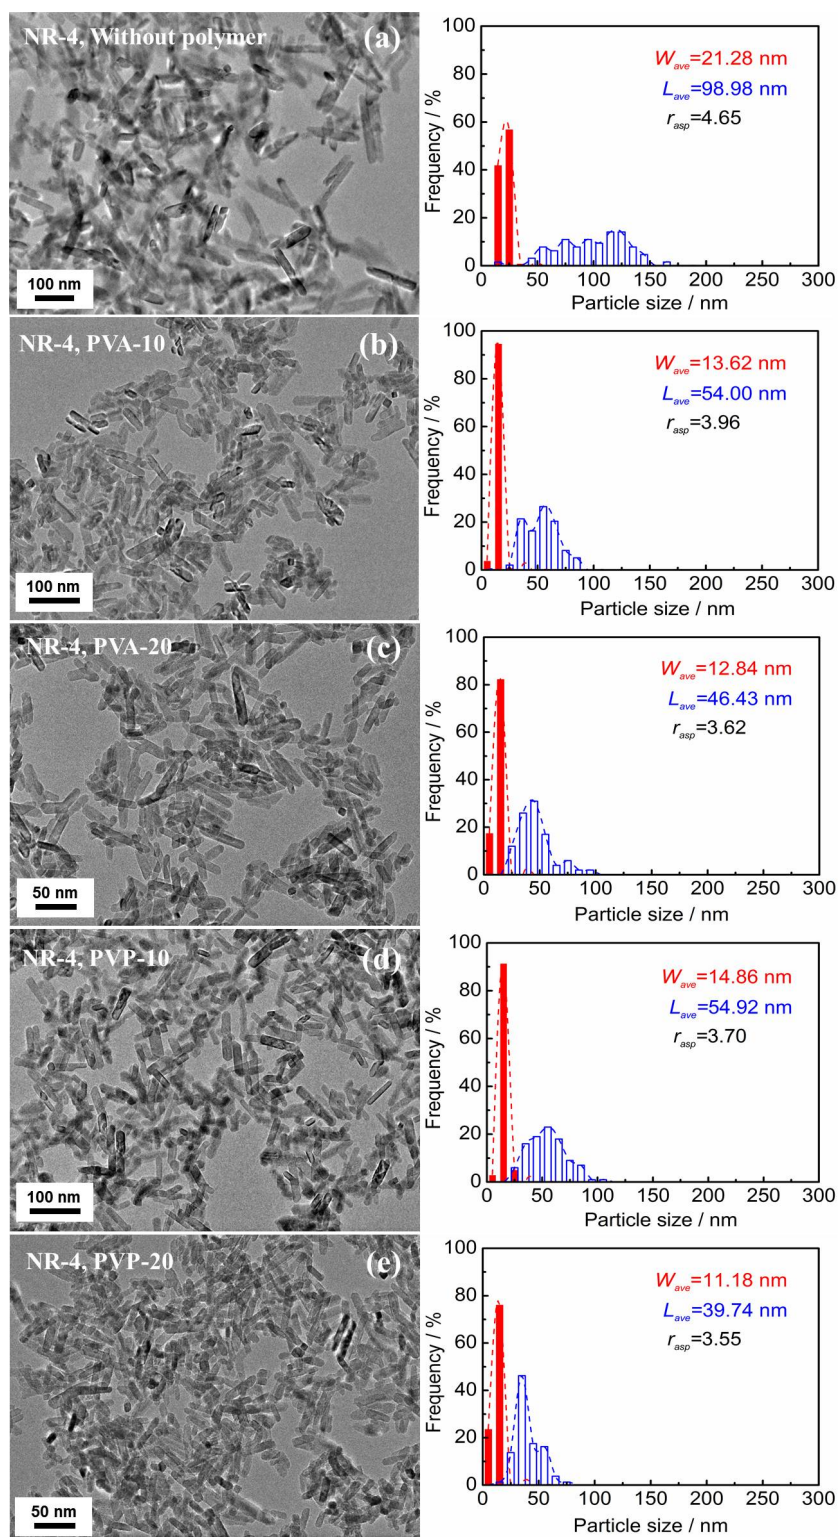

**Fig. S6** TEM images (left) and corresponding histograms of particle width (red) and length (blue) (right) of samples NR-4 (a) without polymer (b) with 10 mg PVA (c) with 20 mg PVA (d) with 10 mg PVP (e) with 20 mg PVP.



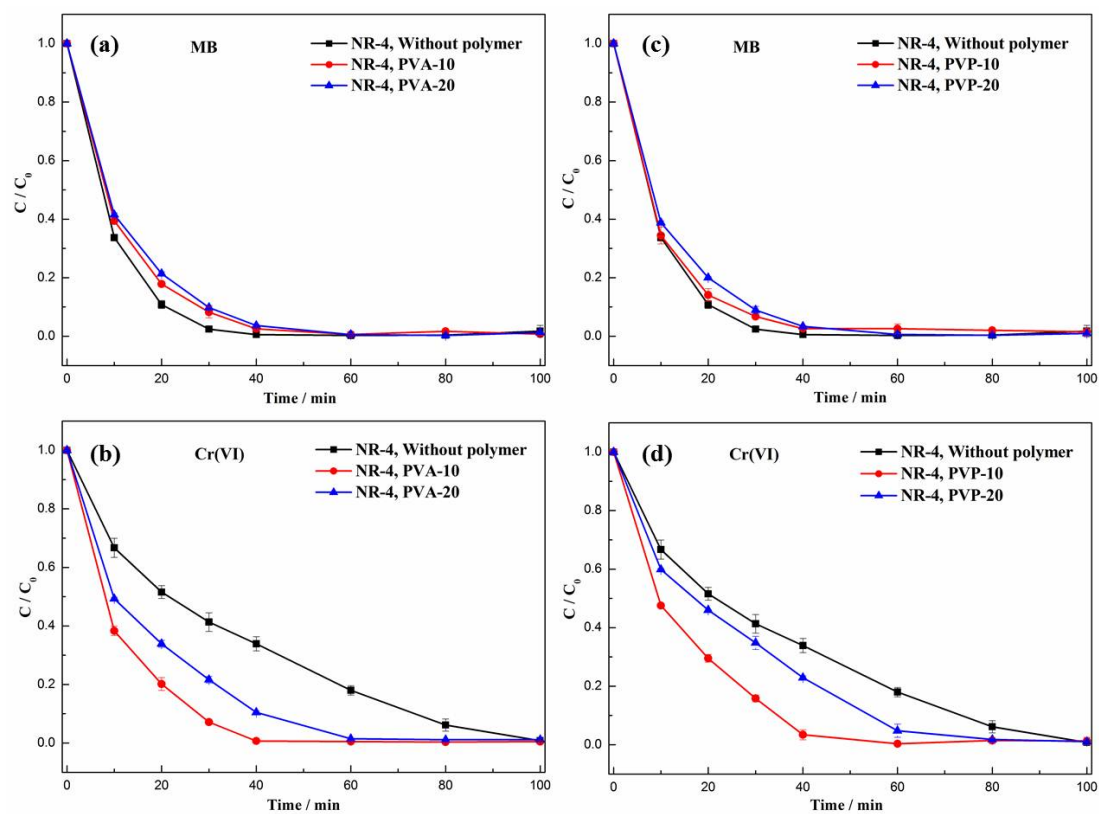

**Fig. S7** Photocatalytic evolution of the concentration ( $C/C_0$ ) of MB degradation and Cr(VI) reduction using NR-4 samples synthesized without polymer and with different amounts of PVA / PVP.

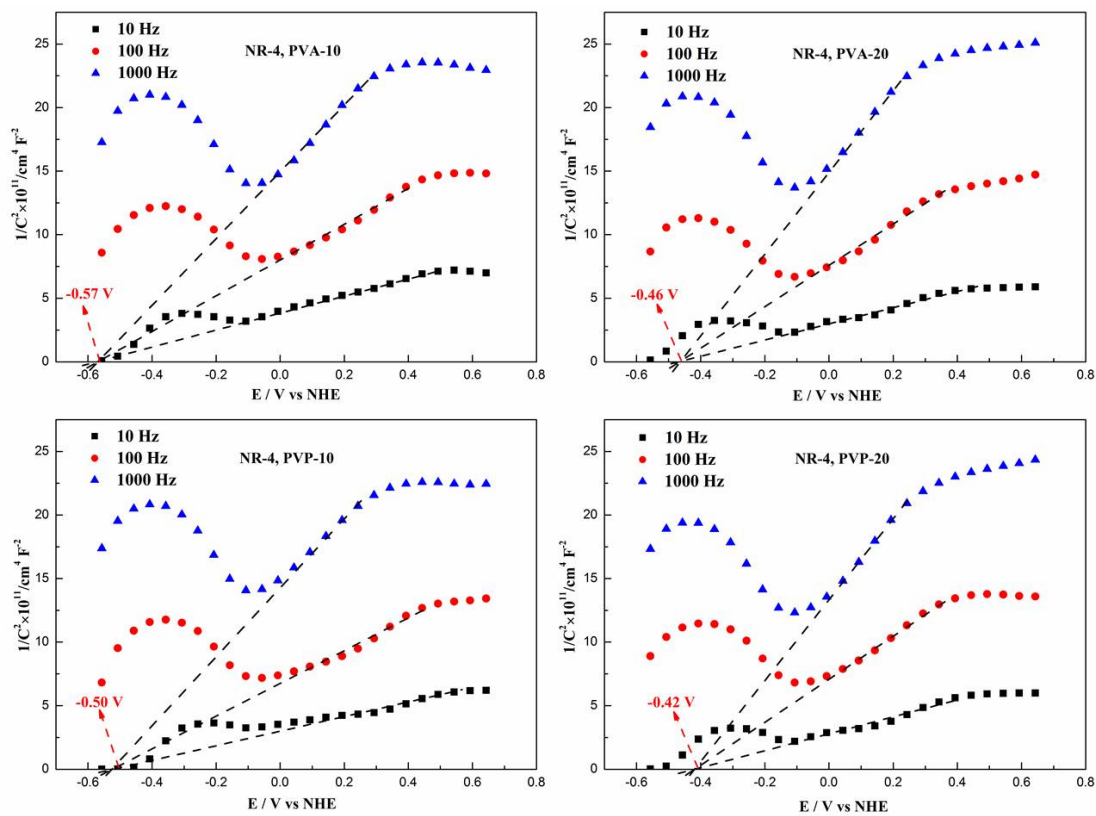

**Fig. S8** Mott-Schottky plots obtained at different frequencies for the TiO<sub>2</sub> film electrodes prepared with samples NR-4 with different amounts of PVA / PVP (TiO<sub>2</sub> film / Saturated Calomel / Pt in 0.1 M KCl).

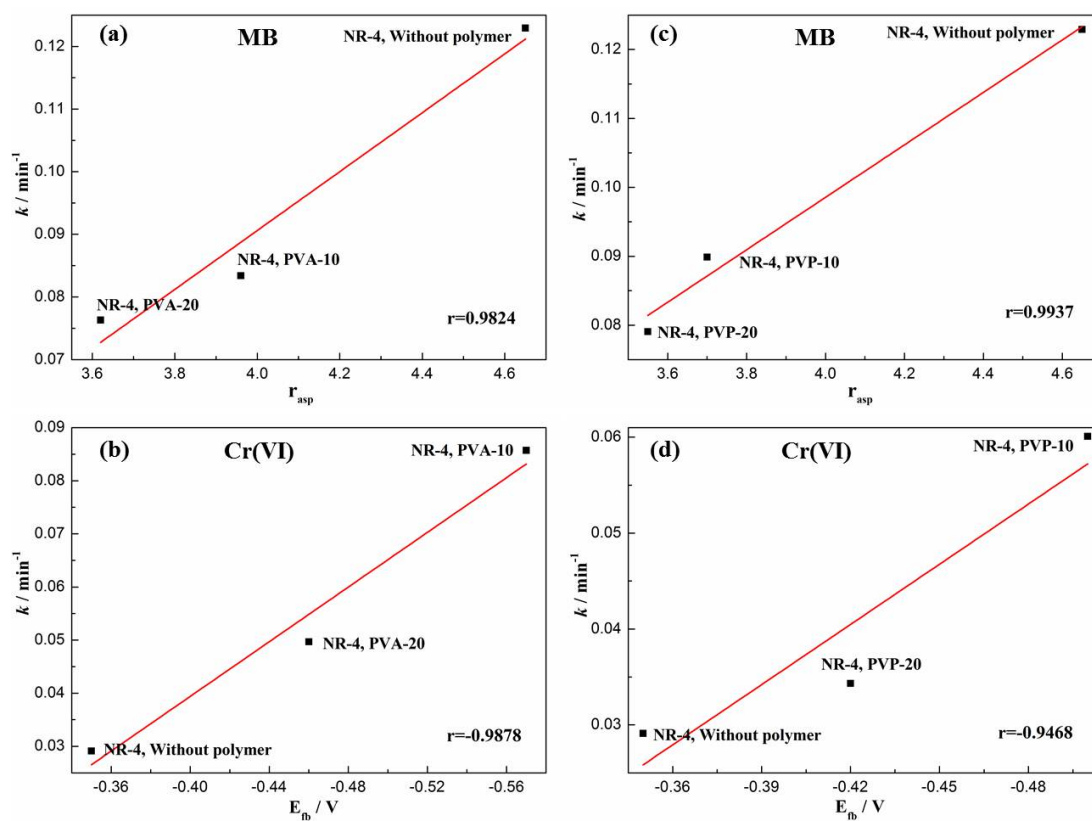

**Fig. S9** Correlations between (a) (c)  $k$  and  $r_{\text{asp}}$ ; (b) (d)  $k$  and  $E_{\text{fb}}$  of samples NR-4 without polymer and with different amounts of PVA or PVP for photocatalytic MB degradation and Cr(VI) reduction.

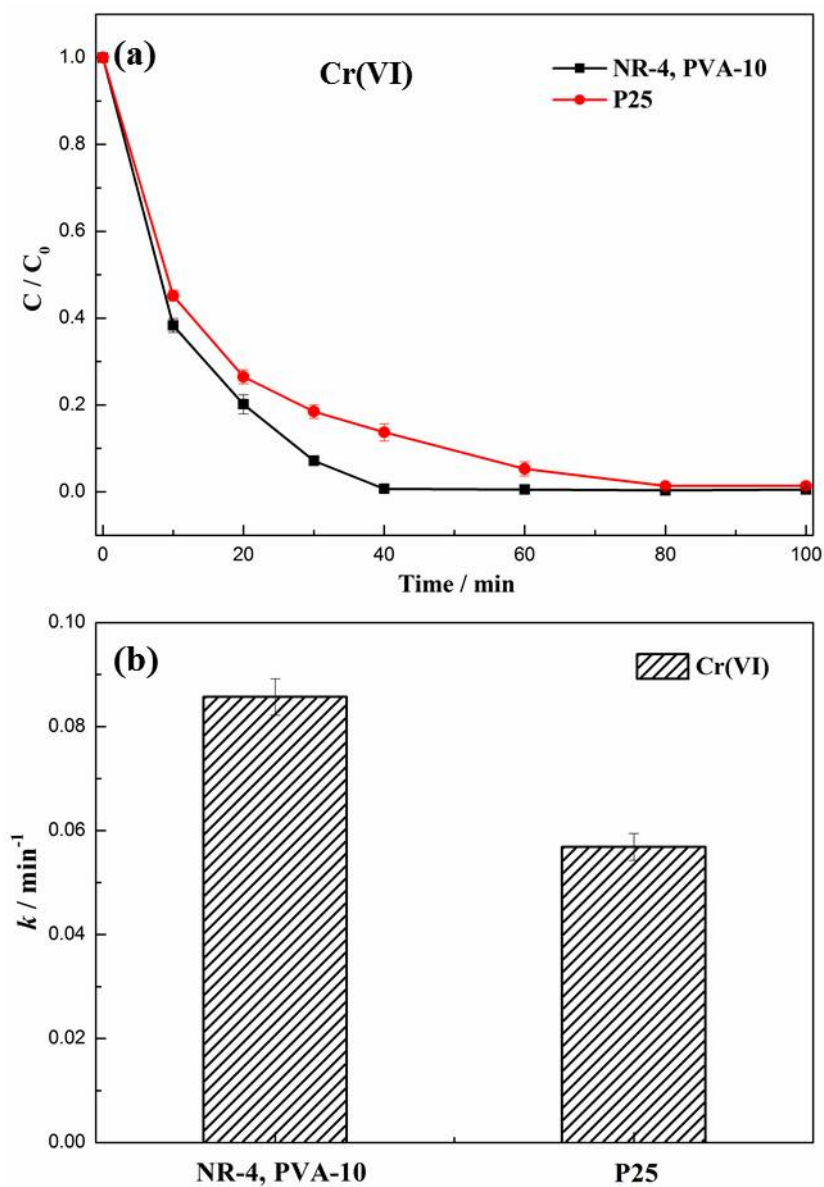

**Fig. S10** (a) Photocatalytic evolution of the concentration ( $C/C_0$ ) and (b) rate constants ( $k$ ) for the initial 30 min of photocatalytic Cr(VI) reduction using sample NR-4 with PVA-10 and the Degussa P25 ( $S_{\text{BET}}=51.67 \text{ m}^2 \text{ g}^{-1}$ ).
